# Supplementary material
Source: PubMed Central journal article supplement (PMC6300158)
Supplement: NIHMS974950-supplement-Supplemental_Information.pdf [file NIHMS974950-supplement-Supplemental_Information.pdf]

## **Supplementary Material**

# **Influence of hyaluronic acid transitions in tumor microenvironment on glioblastoma malignancy and invasive behavior**

Jee-Wei E Chen<sup>1</sup>, Sara Pedron<sup>2</sup>, Peter Shyu<sup>3</sup>, Yuhang Hu<sup>3</sup>, Jann N Sarkaria<sup>4</sup>, Brendan A C Harley<sup>1,2\*</sup>

**Supplemental Table 1.** Buffers and antibodies used in Western blotting

| <b>Buffer</b> | <b>Composition</b>                                  |
|---------------|-----------------------------------------------------|
| 5% NFDM       | 5 wt% Nonfat Instant Dry Milk (Great Value) in TBST |

| <b>Target name</b>         | <b>Blocking buffer</b> | <b>Primary antibody</b>                      | <b>Secondary antibody</b>                                   |
|----------------------------|------------------------|----------------------------------------------|-------------------------------------------------------------|
| HAS1<br>(64 kDa)           | 5% NFDM                | 1:1000 in 5% NFDM<br>(Abcam, ab128321)       | 1:2500 in TBST<br><br>(Cell Signaling<br>Technology, 7074S) |
| HAS2<br>(60 kDa)           |                        | 1:1000 in 5% NFDM<br>(Abcam, ab131364)       |                                                             |
| HAS3<br>(63 kDa)           |                        | 1:250 in 5% NFDM<br>(Abcam, ab138541)        |                                                             |
| HYAL1<br>(48 kDa)          |                        | 1:500 in 5% NFDM<br>(Abcam, ab85375)         |                                                             |
| HYAL2<br>(50 kDa)          |                        | 1:250 in 5% NFDM<br>(Abcam, ab68608)         |                                                             |
| $\beta$ -actin<br>(48 kDa) |                        | 1:1000 in 5% NFDM<br>(Cell Signaling, 4967S) |                                                             |

## Supplemental Figures

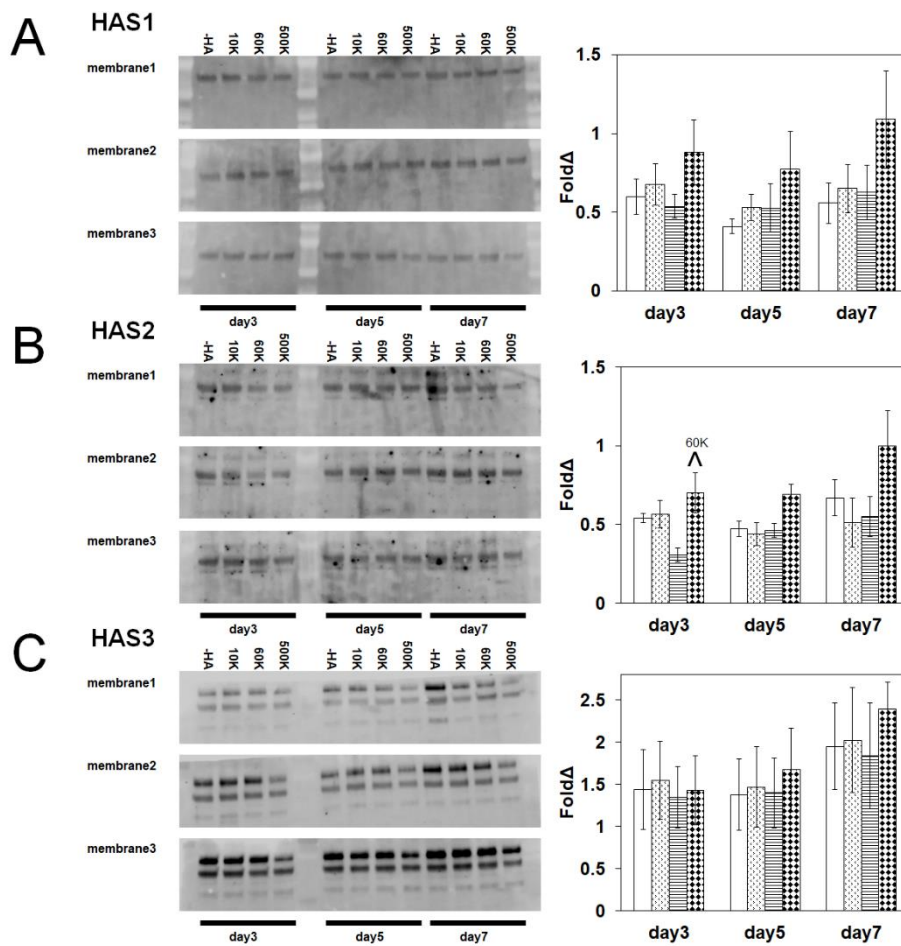

**Figure S1.** Hyaluronan synthase (HAS) protein expression of GBM cells in gelatin hydrogels as a function of matrix immobilized HA molecular weight, determined via Western Blot at days 3, 5 and 7.  $\beta$ -actin is used as loading control. ^  $p < 0.05$  significant increase between different groups.

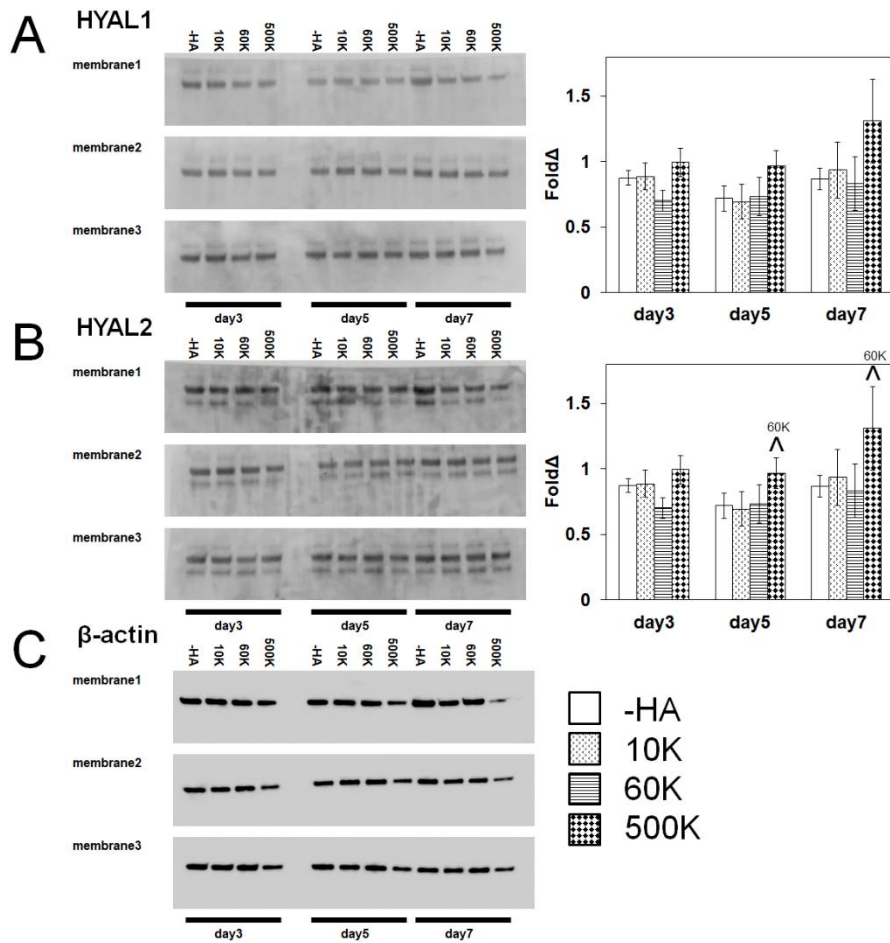

**Figure S2.** Hyaluronidase (HYAL) protein expression of GBM cells in gelatin hydrogels as a function of matrix immobilized HA molecular weight, determined via Western Blot at days 3, 5 and 7.  $\beta$ -actin is used as loading control. ^  $p < 0.05$  significant increase between different groups.
